# Supplementary material
Source: publisher figshare collection journal article supplement (https://acs.figshare.com/ndownloader/files/3876718)
Supplement: Supplementary file 1 [file 3876718]

## Supporting information

### **CO<sub>2</sub> Absorption into Aqueous Solutions containing 3-Piperidinemethanol (3-PM): CO<sub>2</sub> Mass Transfer, Stopped-Flow Kinetics, <sup>1</sup>H/<sup>13</sup>C NMR and Vapour-Liquid Equilibrium Investigations**

**William Conway**<sup>1\*</sup>, Yaser Beyad<sup>2</sup>, Marcel Maeder<sup>3</sup>, Robert Burns<sup>3</sup>, Paul Feron<sup>1</sup>, and Graeme Puxty<sup>1</sup>

- 1. CSIRO Energy Flagship, Mayfield West, NSW 2304, Australia*
- 2. CSIRO Energy Flagship, Clayton, VIC 3169, Australia*
- 3. Department of Chemistry, The University of Newcastle, Callaghan, NSW 2308, Australia*

\* Corresponding author – Dr William Conway, CSIRO Energy Flagship, 10 Murray Dwyer Circuit, Mayfield West, NSW 2308, Australia [will.conway@csiro.au](mailto:will.conway@csiro.au) ph + 61249 606098

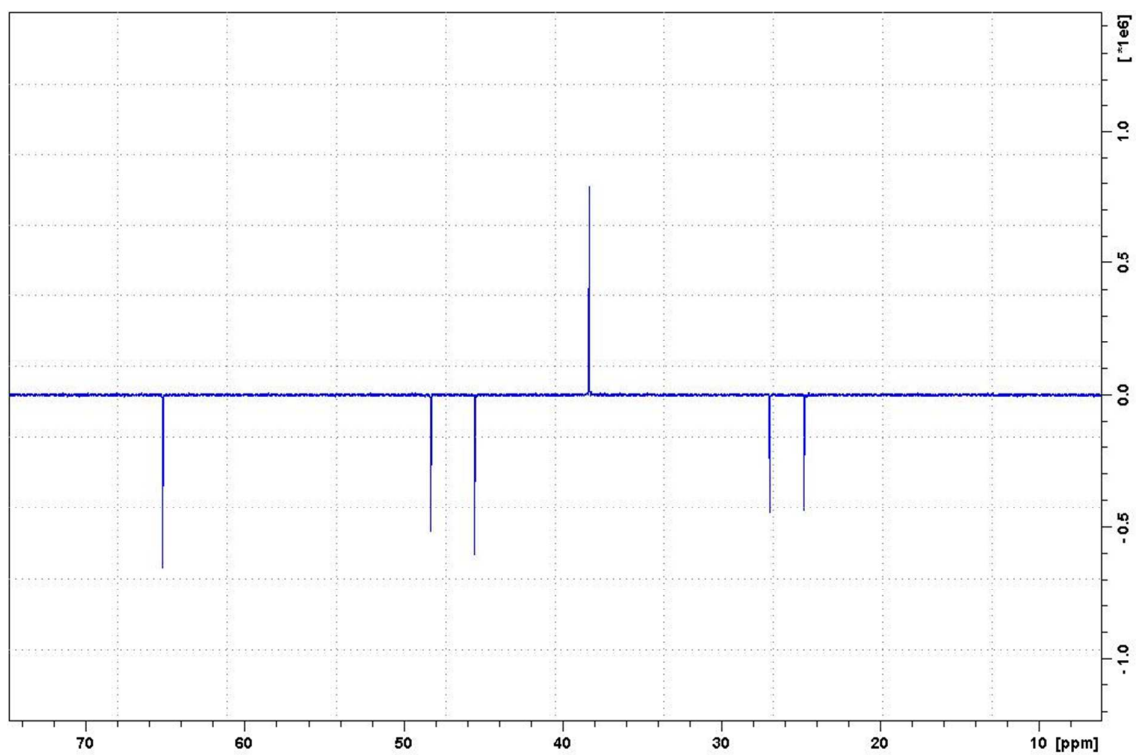

**Figure S1.** 1-Dimensional (1D) DEPT-135  $^{13}\text{C}$  spectra

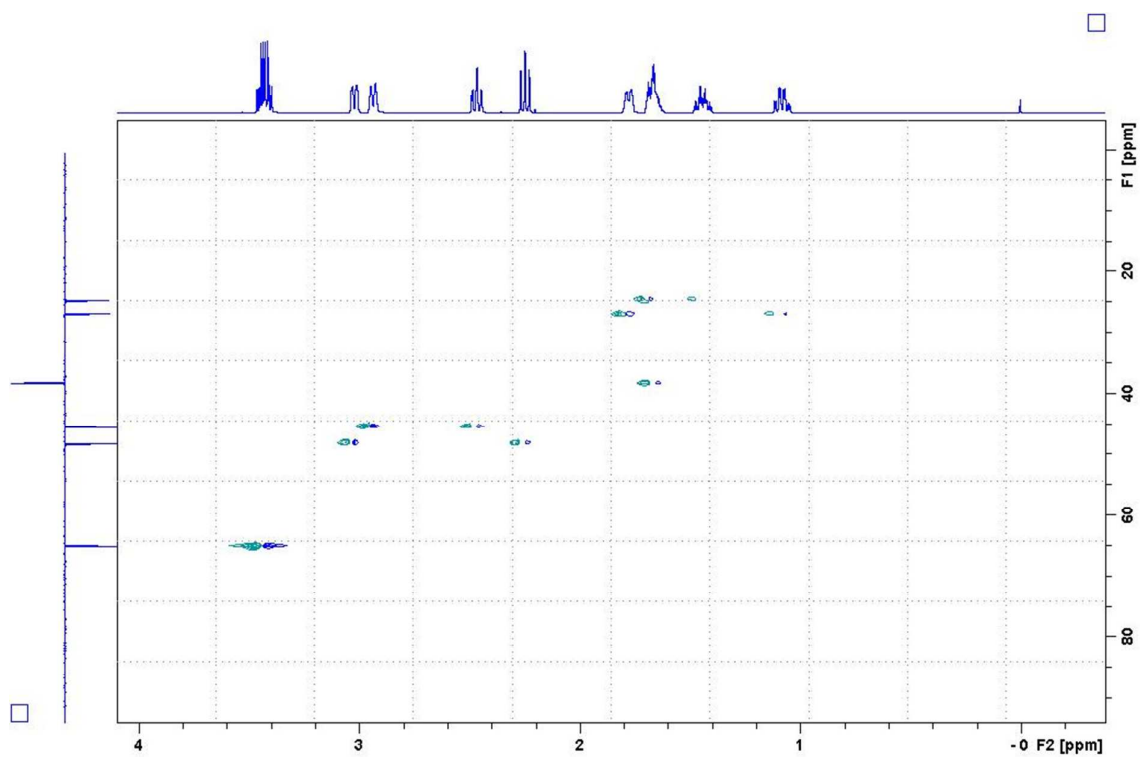

**Figure S2.** 2-Dimensional (2D) HSQC correlation spectra

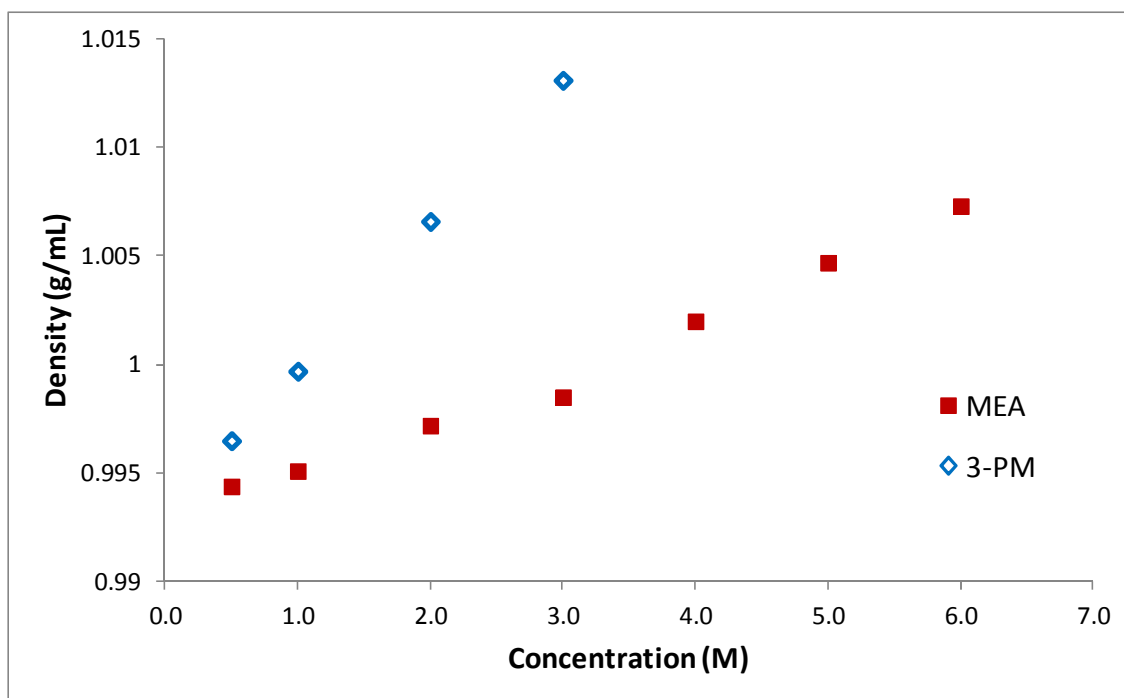

**Figure S3.** Density data at 40°C as a function of amine concentration in 3-PM and MEA solutions

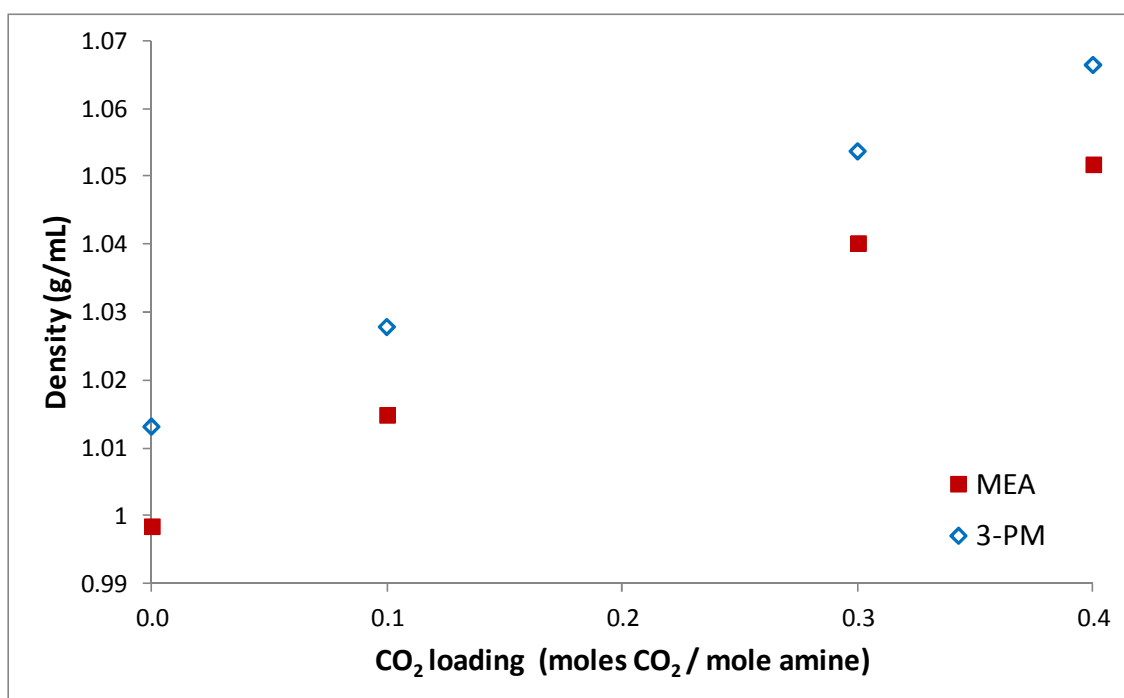

**Figure S4.** Density data at 40°C in 3.0M solutions of 3-PM and MEA over a range of CO<sub>2</sub> loadings from 0.0 – 0.4 moles CO<sub>2</sub> / mole amine.

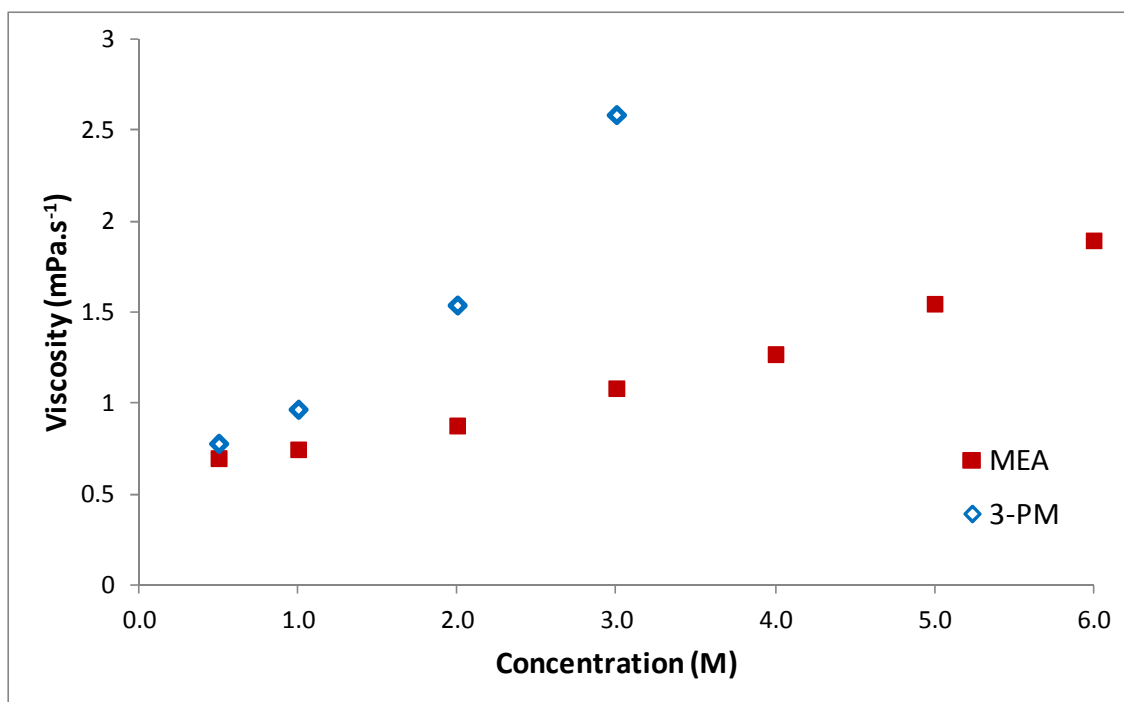

**Figure S5.** Viscosity data at 40°C as a function of amine concentration in 3-PM and MEA solutions

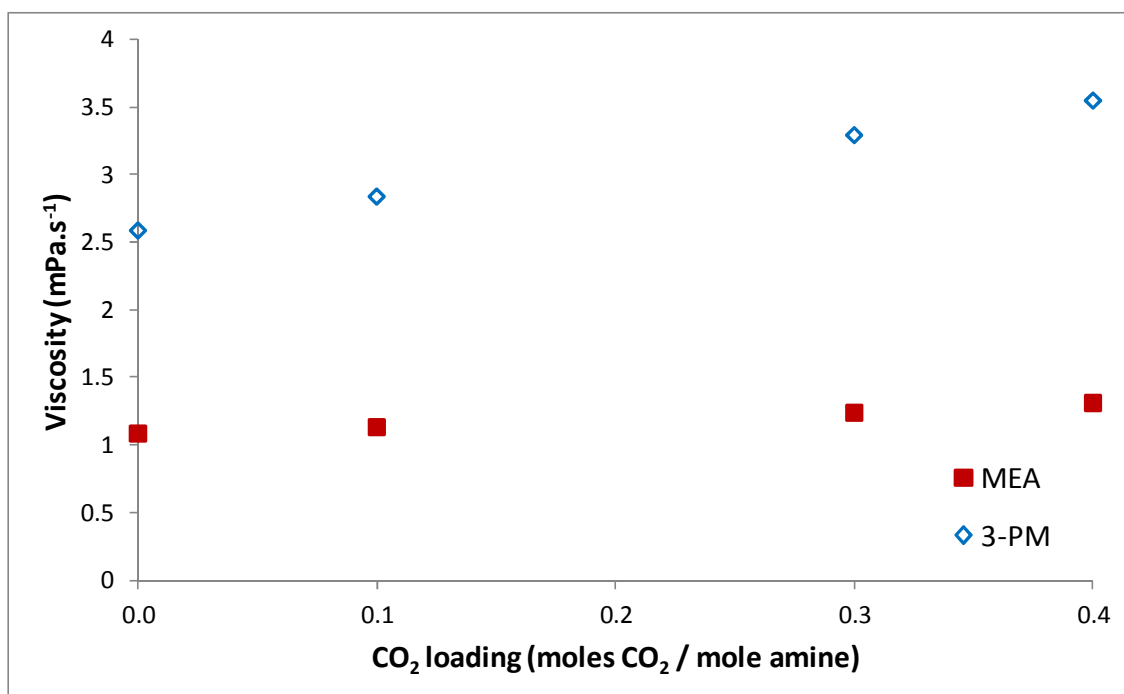

**Figure S6.** Viscosity data at 40°C in 3.0M solutions of 3-PM and MEA and over a range of CO<sub>2</sub> loadings from 0.0 – 0.4 moles CO<sub>2</sub> / mole amine.

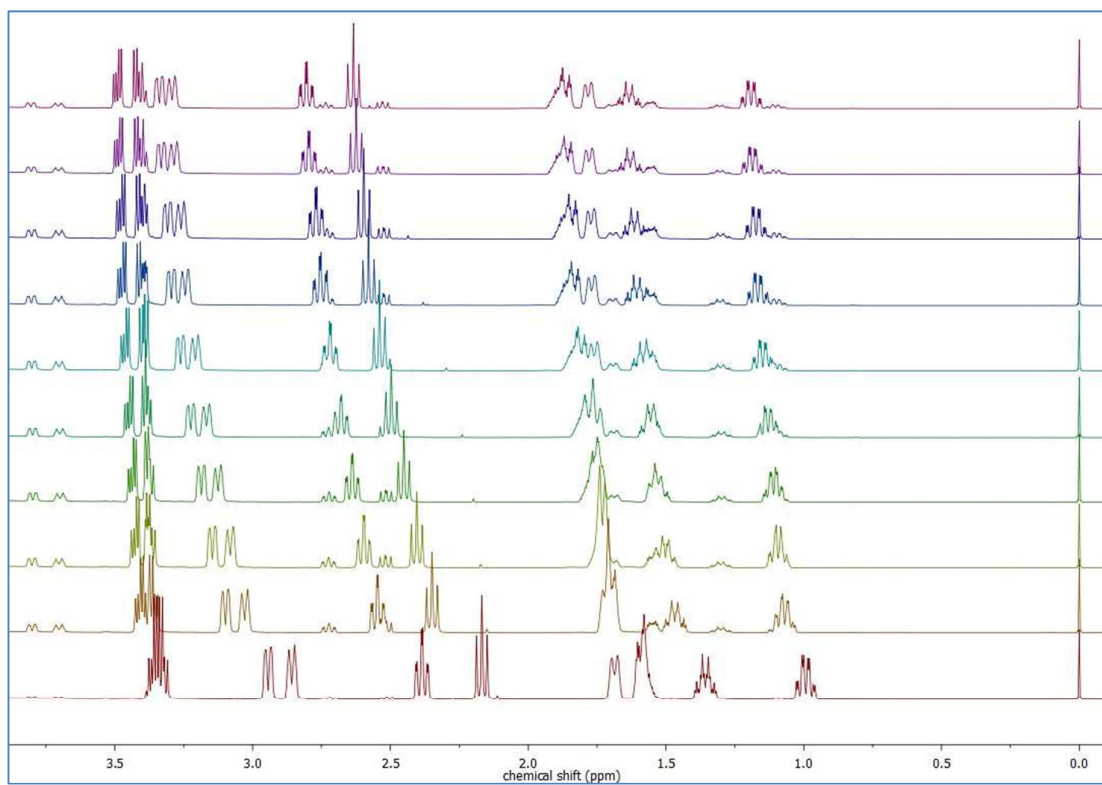

**Figure S7.** Stacked  $^1\text{H}$  Spectra of equilibrium solutions at  $25.0^\circ\text{C}$  containing 0.5M 3-PM, 1.0M  $\text{Na}_2\text{CO}_3$ , and varying amounts of additional HCl – Decreasing pH from top to bottom

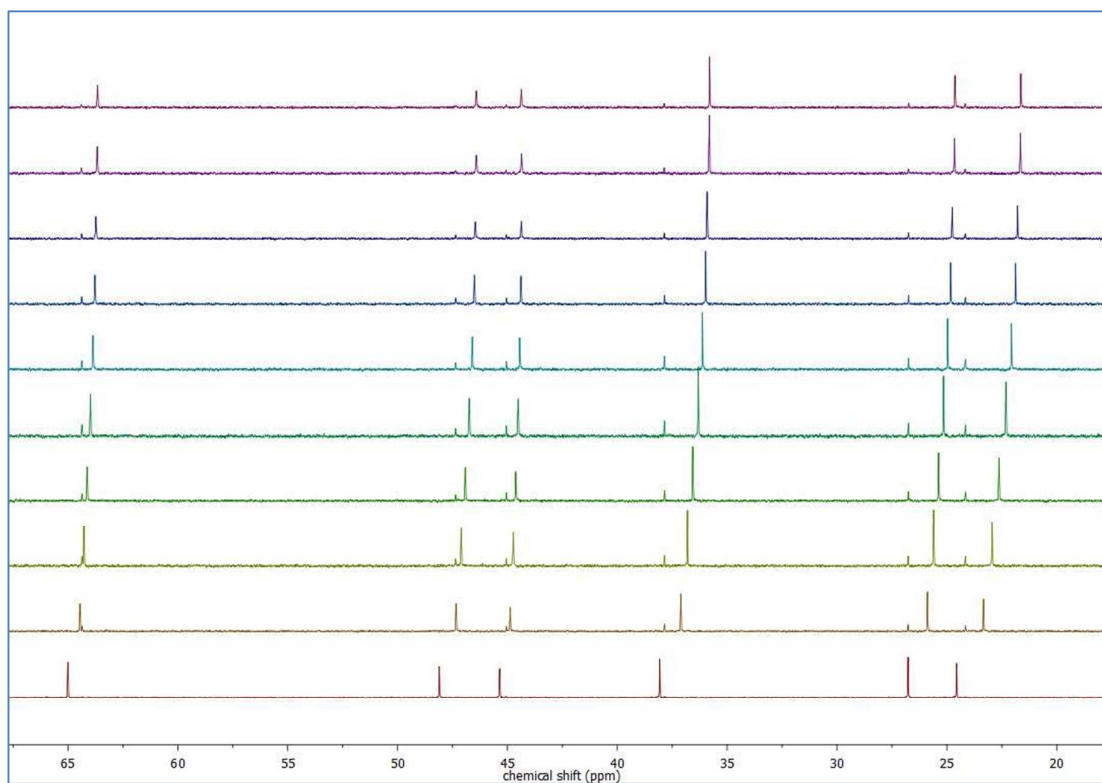

**Figure S8.** Stacked  $^{13}\text{C}$  Spectra of equilibrium solutions at  $25.0^\circ\text{C}$  containing 0.5M 3-PM, 1.0M  $\text{Na}_2\text{CO}_3$ , and varying amounts of additional HCl – Decreasing pH from top to bottom

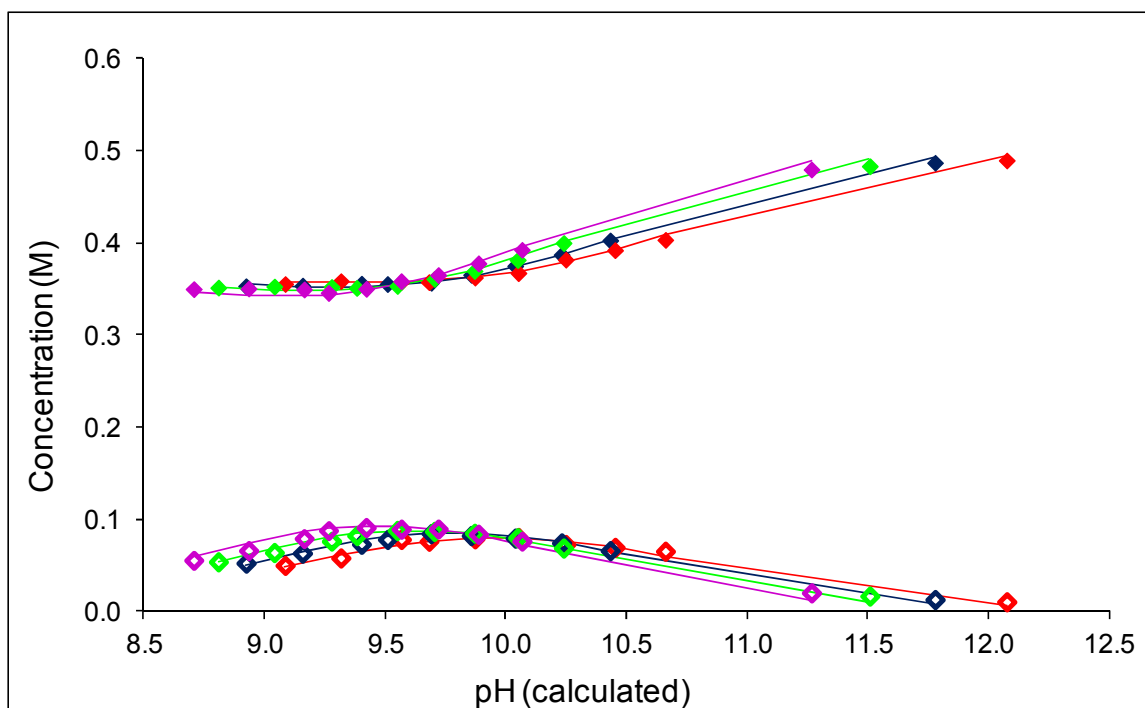

**Figure S9.** Concentration of 3-PM/3-PMH<sup>+</sup> and 3-PM carbamate/3-PMcarbamic acid as a function of temperature and pH (calculated) in equilibrium solutions containing 0.5M 3-PM and 1.0M Na<sub>2</sub>CO<sub>3</sub> via the analysis of <sup>1</sup>H NMR spectrum. Solid markers represent amine; hollow markers represent carbamate; left to right indicates decreasing temperature.
